# Supplementary material for: Spatial distribution and source apportionment of PFASs in surface sediments from five lake regions, China
Source: PubMed Central journal article supplement (PMC4780192; doi:10.1038/srep22674), 2016-03-07
Supplement: srep22674-s1.pdf [file srep22674-s1.pdf]

## **Supporting information for**

### **Spatial distribution and source apportionment of PFASs in surface sediments from five lake regions, China**

Yanjie Qi <sup>a, b</sup>, Shouliang Huo <sup>a\*</sup>, Beidou Xi <sup>a</sup>, Shibin Hu <sup>b</sup>, Jingtian Zhang <sup>a</sup>, Zhuoshi He <sup>a</sup>

<sup>a</sup> State Key Laboratory of Environmental Criteria and Risk Assessment, Chinese Research  
Academy of Environmental Science, Beijing 100012, China

<sup>b</sup> College of Natural Resources and Environment, Northwest A&F University, Yangling  
712100, China

\*Corresponding author: Tel.: +86 (10) 84937970. Fax: +86 (10) 84913805. E-mail:

huosl@craes.org.cn.

Number of tables: 3

Number of figures: 2

Number of pages: 8

## Supporting information legends

**Table S1** | Abbreviations, mass transitions, retention times (min) for the studied perfluoroalkyl substances (PFASs)

**Table S2** | Geographic and limnological features of forty-eight lakes and two reservoirs studied

**Table S3** | Limits of detection (ng/mL), limits of quantitation (ng/mL), blank spike recoveries (%), n=5) and matrix spike recoveries (%), n=5) for PFASs (n indicates the number of samples analyzed; mean  $\pm$  SD) <sup>a</sup>

**Figure S1** | A map plotting for forty-eight lakes and two reservoirs studied. (We created the map using the ArcGIS 9.2 software for windows 2000/XP/VISTA/7 and the Microsoft Office 2010 software for windows 2003/XP/VISTA/7.)

**Figure S2** | Concentrations (ng/g dw) of PFASs in surface sediments from China, Japan, Austria, Germany, Australia, the USA and Canada (including sample size  $\geq 1$ ; No bar: no corresponding values) <sup>8-15</sup>. (We created the map using the Microsoft Office 2010 software for windows 2003/XP/VISTA/7.)

Table S1 | Abbreviations, mass transitions, retention times (min) for the studied perfluoroalkyl substances (PFASs)

| Analyte                                                               | Acronym                              | Precursor/product ion    | Retention time | Quantification by internal standard  |
|-----------------------------------------------------------------------|--------------------------------------|--------------------------|----------------|--------------------------------------|
| <b>Target analytes</b>                                                |                                      |                          |                |                                      |
| Perfluorobutyric acid                                                 | PFBA                                 | 212.9/168.9              | 1.68           | <sup>13</sup> C <sub>4</sub> -PFBA   |
| Perfluoropentanoic acid                                               | PFPeA                                | 262.9/218.9, 262.9/69.0  | 2.19           | <sup>13</sup> C <sub>4</sub> -PFBA   |
| Perfluorohexanoic acid                                                | PFHxA                                | 312.9/268.9, 312.9/119.1 | 2.78           | <sup>13</sup> C <sub>2</sub> -PFHxA  |
| Perfluoroheptanoic acid                                               | PFHpA                                | 362.9/318.9, 362.9/168.9 | 3.41           | <sup>13</sup> C <sub>2</sub> -PFHxA  |
| Perfluorooctanoate acid                                               | PFOA                                 | 412.9/368.9, 412.9/169.0 | 4.00           | <sup>13</sup> C <sub>4</sub> -PFOA   |
| Perfluorononanoic acid                                                | PFNA                                 | 462.9/418.9, 462.9/218.9 | 4.53           | <sup>13</sup> C <sub>5</sub> -PFNA   |
| Perfluorodecanoic acid                                                | PFDA                                 | 512.9/468.9, 512.9/268.9 | 5.03           | <sup>13</sup> C <sub>2</sub> -PFDA   |
| Perfluoroundecanoic acid                                              | PFUnDA                               | 562.9/518.8, 562.9/268.8 | 5.48           | <sup>13</sup> C <sub>2</sub> -PFUnDA |
| Perfluorododecanoic acid                                              | PFDoDA                               | 612.9/568.9, 612.9/318.8 | 5.83           | <sup>13</sup> C <sub>2</sub> -PFDoDA |
| Perfluorotridecanoic acid                                             | PFTTrDA                              | 662.9/618.9, 662.9/368.9 | 6.15           | <sup>13</sup> C <sub>2</sub> -PFDoDA |
| Perfluorotetradecanoic acid                                           | PFTeDA                               | 712.9/668.9, 712.9/368.9 | 6.42           | <sup>13</sup> C <sub>2</sub> -PFDoDA |
| Perfluorohexadecanoic acid                                            | PFHxDA                               | 812.9/768.9, 812.9/468.9 | 6.85           | <sup>13</sup> C <sub>2</sub> -PFDoDA |
| Perfluorooctadecanoic acid                                            | PFOcDA                               | 912.9/869.1, 912.9/568.9 | 7.22           | <sup>13</sup> C <sub>2</sub> -PFDoDA |
| Perfluorobutane sulfonic acid                                         | PFBS                                 | 298.9/99, 298.9/79.9     | 2.29           | <sup>18</sup> O <sub>2</sub> -PFHxS  |
| Perfluorohexane sulfonic acid                                         | PFHxS                                | 398.9/99, 398.8/79.9     | 3.44           | <sup>18</sup> O <sub>2</sub> -PFHxS  |
| Perfluorooctane sulfonic acid                                         | PFOS                                 | 498.9/99, 498.9/79.9     | 4.56           | <sup>13</sup> C <sub>4</sub> -PFOS   |
| Perfluorodecane sulfonic acid                                         | PFDS                                 | 598.9/99, 598.9/79.9     | 5.46           | <sup>13</sup> C <sub>4</sub> -PFOS   |
| <b>Internal standards</b>                                             |                                      |                          |                |                                      |
| Perfluoro-n-[1,2,3,4- <sup>13</sup> C <sub>4</sub> ] butanoic acid    | <sup>13</sup> C <sub>4</sub> -PFBA   | 216.9/171.9              | 1.67           | <sup>13</sup> C <sub>8</sub> -PFOA   |
| Perfluoro-n-[1,2- <sup>13</sup> C <sub>2</sub> ] hexanoic acid        | <sup>13</sup> C <sub>2</sub> -PFHxA  | 314.9/269.9              | 2.77           | <sup>13</sup> C <sub>8</sub> -PFOA   |
| Perfluoro-n-[1,2,3,4- <sup>13</sup> C <sub>4</sub> ] octanoic acid    | <sup>13</sup> C <sub>4</sub> -PFOA   | 416.9/371.9              | 3.99           | <sup>13</sup> C <sub>8</sub> -PFOA   |
| Perfluoro-n-[1,2,3,4,5- <sup>13</sup> C <sub>5</sub> ] nonanoic acid  | <sup>13</sup> C <sub>5</sub> -PFNA   | 467.9/422.9              | 4.52           | <sup>13</sup> C <sub>8</sub> -PFOA   |
| Perfluoro-n-[1,2- <sup>13</sup> C <sub>2</sub> ] decanoic acid        | <sup>13</sup> C <sub>2</sub> -PFDA   | 514.9/469.9              | 5.02           | <sup>13</sup> C <sub>8</sub> -PFOA   |
| Perfluoro-n-[1,2- <sup>13</sup> C <sub>2</sub> ] undecanoic acid      | <sup>13</sup> C <sub>2</sub> -PFUnDA | 564.9/519.8              | 5.46           | <sup>13</sup> C <sub>8</sub> -PFOA   |
| Perfluoro-n-[1,2- <sup>13</sup> C <sub>2</sub> ] dodecanoic acid      | <sup>13</sup> C <sub>2</sub> -PFDoDA | 614.9/569.9              | 5.82           | <sup>13</sup> C <sub>8</sub> -PFOA   |
| Perfluoro-1-hexane [ <sup>18</sup> O <sub>2</sub> ] sulfonate         | <sup>18</sup> O <sub>2</sub> -PFHxS  | 402.9/103.0              | 3.43           | <sup>13</sup> C <sub>8</sub> -PFOS   |
| Perfluoro-1- [1,2,3,4- <sup>13</sup> C <sub>4</sub> ] octanesulfonate | <sup>13</sup> C <sub>4</sub> -PFOS   | 502.9/99.1               | 4.57           | <sup>13</sup> C <sub>8</sub> -PFOS   |

Table S2 | Geographic and limnological features of forty-eight lakes and two reservoirs studied

| Lake region                 | Lake                             | Serial number | Sampling time         | Sample site                      | Position                        | Lake area (km <sup>2</sup> ) | Mean depth (m) | Catchment area (km <sup>2</sup> ) |
|-----------------------------|----------------------------------|---------------|-----------------------|----------------------------------|---------------------------------|------------------------------|----------------|-----------------------------------|
| East Plain Region           | Lake Wabu <sup>1</sup>           | 1             | 2012.04               | Anhui Province                   | 116°48′~117°01′E 32°23′~32°33′N | 163                          | 2.42           | 800                               |
|                             | Lake Longgan <sup>1</sup>        | 2             | 2012.06               | Anhui Province                   | 115°19′~116°17′E 29°52′~30°05′N | 316                          | 3.78           | 5,511                             |
|                             | Lake Shengjin <sup>1</sup>       | 3             | 2012.07               | Anhui Province                   | 116°58′~117°14′E 30°15′~30°28′N | 78.5                         | 1.26           | 1,554                             |
|                             | Lake Xiangjian <sup>1</sup>      | 4             | 2011.10               | Anhui Province                   | 117°15′~117°45′E 33°06′~33°12′N | 45.0                         | 0.93           | -                                 |
|                             | Lake Chengdong <sup>1</sup>      | 5             | 2012.04               | Anhui Province                   | 116°18′~116°28′E 32°12′~32°22′N | 120                          | 1.50           | 2,128                             |
|                             | Lake Chengxi <sup>1</sup>        | 6             | 2012.04               | Anhui Province                   | 116°01′~116°18′E 32°11′~32°33′N | 199                          | 2.70           | 1,750                             |
|                             | Lake Huayuan <sup>1</sup>        | 7             | 2011.10               | Anhui Province                   | 117°45′~117°53′E 32°55′~33°02′N | 34.0                         | 1.35           | 875                               |
|                             | Lake Baidang <sup>1</sup>        | 8             | 2012.07               | Anhui Province                   | 117°19′~117°27′E 30°47′~30°51′N | 39.7                         | 3.06           | 775                               |
|                             | Lake Bohu <sup>1</sup>           | 9             | 2012.06               | Anhui Province                   | 116°19′~116°33′E 30°04′~30°15′N | 180                          | 4.41           | -                                 |
|                             | Lake Wuchang <sup>1</sup>        | 10            | 2012.06               | Anhui Province                   | 116°36′~116°53′E 30°14′~30°20′N | 101                          | 3.43           | 1,084                             |
|                             | Lake Huangdahu <sup>1</sup>      | 11            | 2012.06               | Anhui Province                   | 116°14′~116°33′E 29°56′~30°08′N | 299                          | 3.94           | -                                 |
|                             | Lake Tuohu <sup>1</sup>          | 12            | 2011.10               | Anhui Province                   | 117°45′~117°51′E 33°09′~33°17′N | 40.0                         | 1.20           | -                                 |
|                             | Lake Nvshan <sup>1</sup>         | 13            | 2011.10               | Anhui Province                   | 117°58′~118°14′E 32°50′~33°02′N | 105                          | 1.71           | 4,215                             |
|                             | Lake Chaohu <sup>1</sup>         | 14            | 2011.12               | Anhui Province                   | 117°16′~117°05′E 31°25′~31°43′N | 770                          | 2.69           | 9,258                             |
|                             | Lake Luoma <sup>1</sup>          | 15            | 2013.06               | Jiangsu Province                 | 118°04′~118°18′E 34°00′~34°14′N | 260                          | 3.30           | 51,215                            |
|                             | Lake Cheng <sup>1</sup>          | 16            | 2013.07               | Jiangsu Province                 | 120°48′~120°52′E 31°10′~31°14′N | 45.0                         | 1.83           | -                                 |
|                             | Lake Yuandang <sup>1</sup>       | 17            | 2013.07               | Jiangsu Province                 | 120°51′~120°54′E 31°03′~31°05′N | 12.9                         | 1.38           | -                                 |
|                             | Lake Yaohu <sup>1</sup>          | 18            | 2013.08               | Jiangsu Province                 | 119°30′~119°40′E 31°30′~31°40′N | 89.0                         | 1.10           | -                                 |
|                             | Lake Gucheng <sup>1</sup>        | 19            | 2013.08               | Jiangsu Province                 | 118°53′~118°57′E 31°14′~31°18′N | 24.5                         | 1.56           | 248                               |
|                             | Lake Gehu <sup>1</sup>           | 20            | 2013.08               | Jiangsu Province                 | 119°44′~119°53′E 31°29′~31°42′N | 147                          | 1.19           | -                                 |
|                             | Lake Yangcheng <sup>1</sup>      | 21            | 2013.07               | Jiangsu Province                 | 120°39′~120°51′E 31°21′~31°30′N | 119                          | 1.40           | -                                 |
|                             | Lake Sanjiu <sup>1</sup>         | 22            | 2013.08               | Jiangsu Province                 | 119°48′E 31°22′N                | 23.2                         | 1.85           | -                                 |
|                             | Lake Shijiu <sup>1</sup>         | 23            | 2013.08               | Jiangsu Province                 | 118°46′~118°56′E 31°23′~31°33′N | 210                          | 4.08           | 18,600                            |
|                             | Lake Gaoyou <sup>1</sup>         | 24            | 2013.06               | Jiangsu Province                 | 119°06′~119°25′E 32°42′~33°04′N | 675                          | 1.44           | 158,148                           |
|                             | Lake Nansi <sup>1</sup>          | 25            | 2013.06               | Jiangsu Province                 | 116°34′~117°21′E 34°27′~35°20′N | 1,098                        | 1.46           | 30,453                            |
|                             | Lake Shaobo <sup>1</sup>         | 26            | 2013.06               | Jiangsu Province                 | 119°23′~119°30′E 32°30′~32°40′N | 77.0                         | 1.10           | -                                 |
|                             | Lake Hongze <sup>1</sup>         | 27            | 2013.06               | Jiangsu Province                 | 118°10′~118°52′E 33°06′~33°40′N | 1,577                        | 1.77           | 156,000                           |
|                             | Lake Kuncheng <sup>1</sup>       | 28            | 2013.07               | Jiangsu Province                 | 120°43′~120°46′E 31°33′~31°36′N | 18.0                         | 1.78           | -                                 |
|                             | Lake Baima <sup>1</sup>          | 29            | 2013.06               | Jiangsu Province                 | 119°03′~119°11′E 33°09′~33°19′N | 108                          | 0.97           | 950                               |
| Mengxin Plateau Lake Region | Lake Bositeng <sup>1</sup>       | 30            | 2011.10               | Xinjiang Uygur Autonomous Region | 86°41′~87°27′E 41°49′~42°08′N   | 992                          | 8.08           | 27,000                            |
|                             | Lake Wulungu <sup>1</sup>        | 31            | 2011.10               | Xinjiang Uygur Autonomous Region | 87°02′~87°35′E 47°02′~47°25′N   | 753                          | 8.00           | 32,000                            |
| Tibetan Plateau Lake Region | Lake Jili <sup>1</sup>           | 32            | 2011.10               | Xinjiang Uygur Autonomous Region | 87°20′~87°32′E 46°51′~47°00′N   | 174                          | 9.90           | -                                 |
|                             | Lake Hulun <sup>1</sup>          | 33            | 2011.10               | Inner Mongolia Autonomous Region | 116°58′~117°48′E 48°30′~49°20′N | 2,339                        | 5.92           | 37,214                            |
| Tibetan Plateau Lake Region | Lake Wuliangsu <sup>1</sup>      | 34            | 2011.10               | Inner Mongolia Autonomous Region | 108°43′~108°57′E 40°47′~41°03′N | 233                          | 1.12           | 11,800                            |
|                             | Lake Qinghai <sup>1</sup>        | 35            | 2012.07               | Qinghai Province                 | 99°36′~100°47′E 36°32′~37°15′N  | 4,340                        | 17.9           | 29,661                            |
|                             | Lake Basongcuo <sup>2</sup>      | 36            | 2012.07               | Tibet Autonomous Region          | 93°57′E 30°01′N                 | 27.0                         | 120 (Max.)     | -                                 |
|                             | Lake Yamdrok <sup>1</sup>        | 37            | 2012.07               | Tibet Autonomous Region          | 90°21′~91°05′E 28°16′~29°11′N   | 638                          | 20.0~40.0      | 5,422                             |
| Yungui Plateau Lake Region  | Lake Namucuo <sup>1</sup>        | 38            | 2012.07               | Tibet Autonomous Region          | 90°16′~91°03′E 30°30′~30°56′N   | 1,962                        | -              | 8,649                             |
|                             | Lake Yihai <sup>3,4</sup>        | 39            | 2010.08               | Sichuan Province                 | 102°14′E 28°44′N                | 1.00                         | 9.80           | -                                 |
|                             | Daqiao Reservoir <sup>5</sup>    | 40            | 2010.08               | Sichuan Province                 | 102°12′E 28°41′N                | 23.5                         | -              | 796                               |
|                             | Lake Qionghai <sup>1</sup>       | 41            | 2010.08               | Sichuan Province                 | 102°16′~102°21′E 27°47′~27°52′N | 31.0                         | 10.3           | 109                               |
|                             | Lake Mahu <sup>1</sup>           | 42            | 2010.08               | Sichuan Province                 | 103°47′~103°48′E 28°23′~28°26′N | 7.30                         | 65.7           | 97                                |
|                             | Lake Shudu <sup>6</sup>          | 43            | 2010.06               | Yunnan Province                  | 99°57′E 27°55′N                 | 1.70                         | 7.80 (Max.)    | 14                                |
|                             | Lake Qilu <sup>1</sup>           | 44            | 2010.07               | Yunnan Province                  | 102°43′~102°49′E 24°08′~24°13′N | 36.9                         | 4.03           | 341                               |
|                             | Lake Chenghai <sup>1</sup>       | 45            | 2010.06               | Yunnan Province                  | 100°38′~100°41′E 26°27′~26°38′N | 77.2                         | 25.7           | 229                               |
| Northeast Plain Lake Region | Lake Lugu <sup>1</sup>           | 46            | 2010.06               | Yunnan Province                  | 100°45′~100°50′E 27°41′~27°45′N | 48.5                         | 40.3           | 171                               |
|                             | Lake Wudalianchi <sup>1</sup>    | 47            | 2012.07               | Heilongjiang Province            | 126°06′~126°15′E 48°40′~48°47′N | 16.4                         | 1.00-12.00     | -                                 |
|                             | Lake Xingkai <sup>1</sup>        | 48            | 2012.07               | Heilongjiang Province            | 131°58′~132°51′E 44°32′~45°21′N | 1,080                        | 6.28           | 56,000                            |
|                             | Dahuofang Reservoir <sup>7</sup> | 49            | 2012.07               | Liaoning Province                | 120°20′~125°15′E 41°31′~42°15′N | 22.0-91.2                    | -              | 5,437                             |
| Lake Jingbo <sup>1</sup>    | 50                               | 2012.07       | Heilongjiang Province | 128°37′~129°03′E 43°46′~44°03′N  | 91.5                            | 12.9                         | 11,820         |                                   |

Table S3 | Limits of detection (ng/mL), limits of quantitation (ng/mL), blank spike recoveries (% , n=5) and matrix spike recoveries (% , n=5) for PFASs (n indicates the number of samples analyzed; mean  $\pm$  SD) <sup>a</sup>

| Acronym                              | Limits of detection | Limits of quantitation | Blank spike recoveries | Matrix spike recoveries |             |
|--------------------------------------|---------------------|------------------------|------------------------|-------------------------|-------------|
|                                      |                     |                        |                        | 2 ng/mL                 | 20 ng/mL    |
| <b>Target analytes</b>               |                     |                        |                        |                         |             |
| PFBA                                 | 0.01                | 0.05                   | 104 $\pm$ 5            | 88 $\pm$ 9              | 96 $\pm$ 7  |
| PFPeA                                | 0.01                | 0.03                   | 101 $\pm$ 4            | 87 $\pm$ 12             | 95 $\pm$ 9  |
| PFHxA                                | 0.01                | 0.04                   | 97 $\pm$ 3             | 92 $\pm$ 8              | 104 $\pm$ 6 |
| PFHpA                                | 0.02                | 0.06                   | 102 $\pm$ 5            | 109 $\pm$ 9             | 98 $\pm$ 7  |
| PFOA                                 | 0.02                | 0.05                   | 96 $\pm$ 4             | 114 $\pm$ 8             | 102 $\pm$ 6 |
| PFNA                                 | 0.02                | 0.06                   | 112 $\pm$ 5            | 109 $\pm$ 10            | 97 $\pm$ 7  |
| PFDA                                 | 0.02                | 0.05                   | 98 $\pm$ 9             | 91 $\pm$ 13             | 95 $\pm$ 10 |
| PFUnDA                               | 0.02                | 0.08                   | 102 $\pm$ 6            | 111 $\pm$ 10            | 115 $\pm$ 8 |
| PFDoDA                               | 0.01                | 0.03                   | 99 $\pm$ 4             | 91 $\pm$ 10             | 105 $\pm$ 7 |
| PFTTrDA                              | 0.01                | 0.05                   | 96 $\pm$ 7             | 88 $\pm$ 12             | 108 $\pm$ 9 |
| PFTeDA                               | 0.01                | 0.03                   | 92 $\pm$ 9             | 82 $\pm$ 14             | 90 $\pm$ 11 |
| PFHxDA                               | 0.06                | 0.20                   | 89 $\pm$ 8             | 77 $\pm$ 13             | 84 $\pm$ 11 |
| PFOcDA                               | 0.11                | 0.39                   | 77 $\pm$ 10            | 69 $\pm$ 15             | 75 $\pm$ 13 |
| PFBS                                 | 0.02                | 0.06                   | 98 $\pm$ 3             | 90 $\pm$ 7              | 102 $\pm$ 8 |
| PFHxS                                | 0.01                | 0.04                   | 99 $\pm$ 4             | 109 $\pm$ 9             | 93 $\pm$ 6  |
| PFOS                                 | 0.01                | 0.04                   | 101 $\pm$ 4            | 94 $\pm$ 9              | 97 $\pm$ 7  |
| PFDS                                 | 0.01                | 0.03                   | 96 $\pm$ 5             | 92 $\pm$ 8              | 90 $\pm$ 8  |
| <b>Internal standards</b>            |                     |                        |                        |                         |             |
| <sup>13</sup> C <sub>4</sub> -PFBA   |                     |                        |                        | 93 $\pm$ 9              |             |
| <sup>13</sup> C <sub>2</sub> -PFHxA  |                     |                        |                        | 92 $\pm$ 7              |             |
| <sup>13</sup> C <sub>4</sub> -PFOA   |                     |                        |                        | 90 $\pm$ 4              |             |
| <sup>13</sup> C <sub>5</sub> -PFNA   |                     |                        |                        | 87 $\pm$ 8              |             |
| <sup>13</sup> C <sub>2</sub> -PFDA   |                     |                        |                        | 85 $\pm$ 5              |             |
| <sup>13</sup> C <sub>2</sub> -PFUnDA |                     |                        |                        | 89 $\pm$ 7              |             |
| <sup>13</sup> C <sub>2</sub> -PFDoDA |                     |                        |                        | 83 $\pm$ 9              |             |
| <sup>18</sup> O <sub>2</sub> -PFHxS  |                     |                        |                        | 90 $\pm$ 7              |             |
| <sup>13</sup> C <sub>4</sub> -PFOS   |                     |                        |                        | 92 $\pm$ 6              |             |

<sup>a</sup> The spike recoveries of PFASs were calculated using the equation: spike recovery =  $(C_{\text{sample} + \text{spiked}} - C_{\text{sample}}) / C_{\text{spiked}} \times 100\%$ , where  $C_{\text{sample} + \text{spiked}}$  is the concentration of PFASs in a spiked sample,  $C_{\text{sample}}$  is the concentration of PFASs in the sample (same as above without spiked target compounds),  $C_{\text{spiked}}$  is the concentration of the spiked target compound. The recoveries of the stable isotope-labeled internal standards were calculated by the ratio of concentrations in the samples compared with those in the standard solutions.

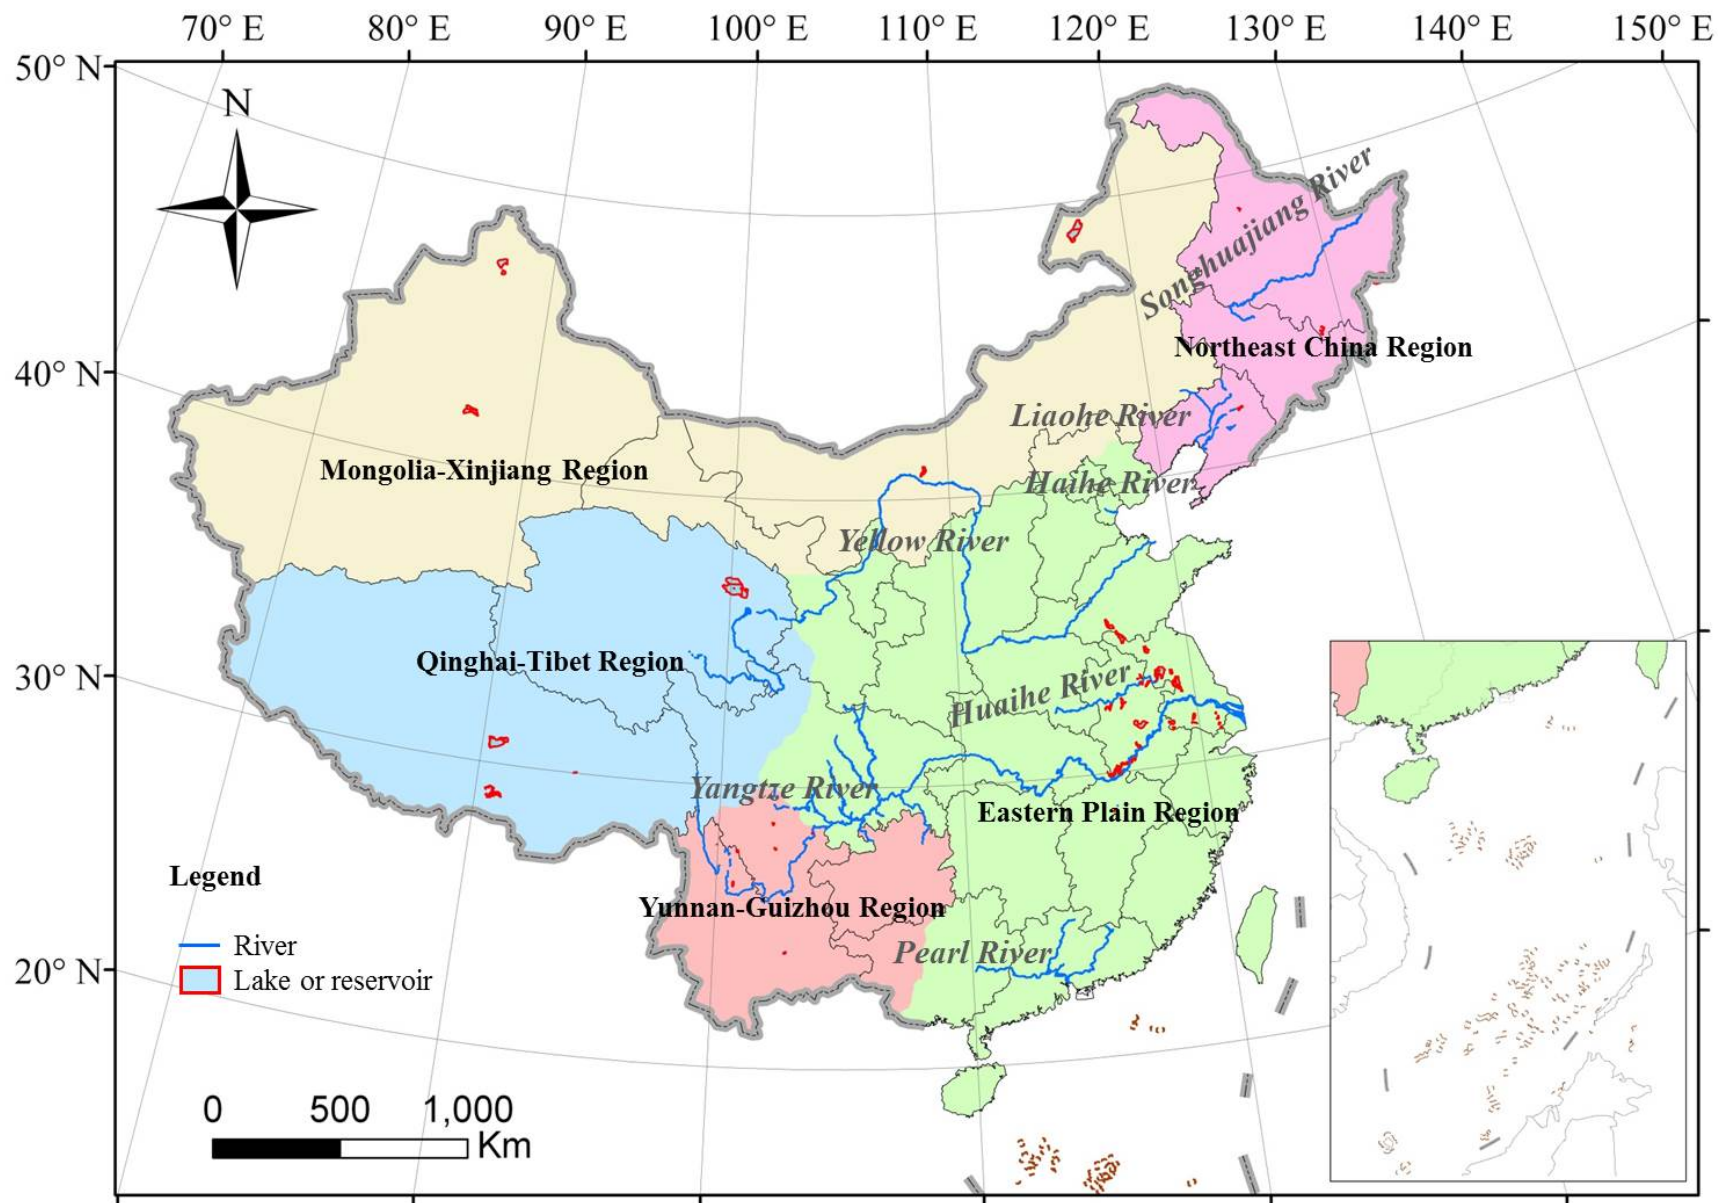

Figure S1 | A map plotting of forty-eight lakes and two reservoirs studied. (We created the map using the ArcGIS 9.2 software for windows 2000/XP/VISTA/7 and the Microsoft Office 2010 software for windows 2003/XP/VISTA/7.)

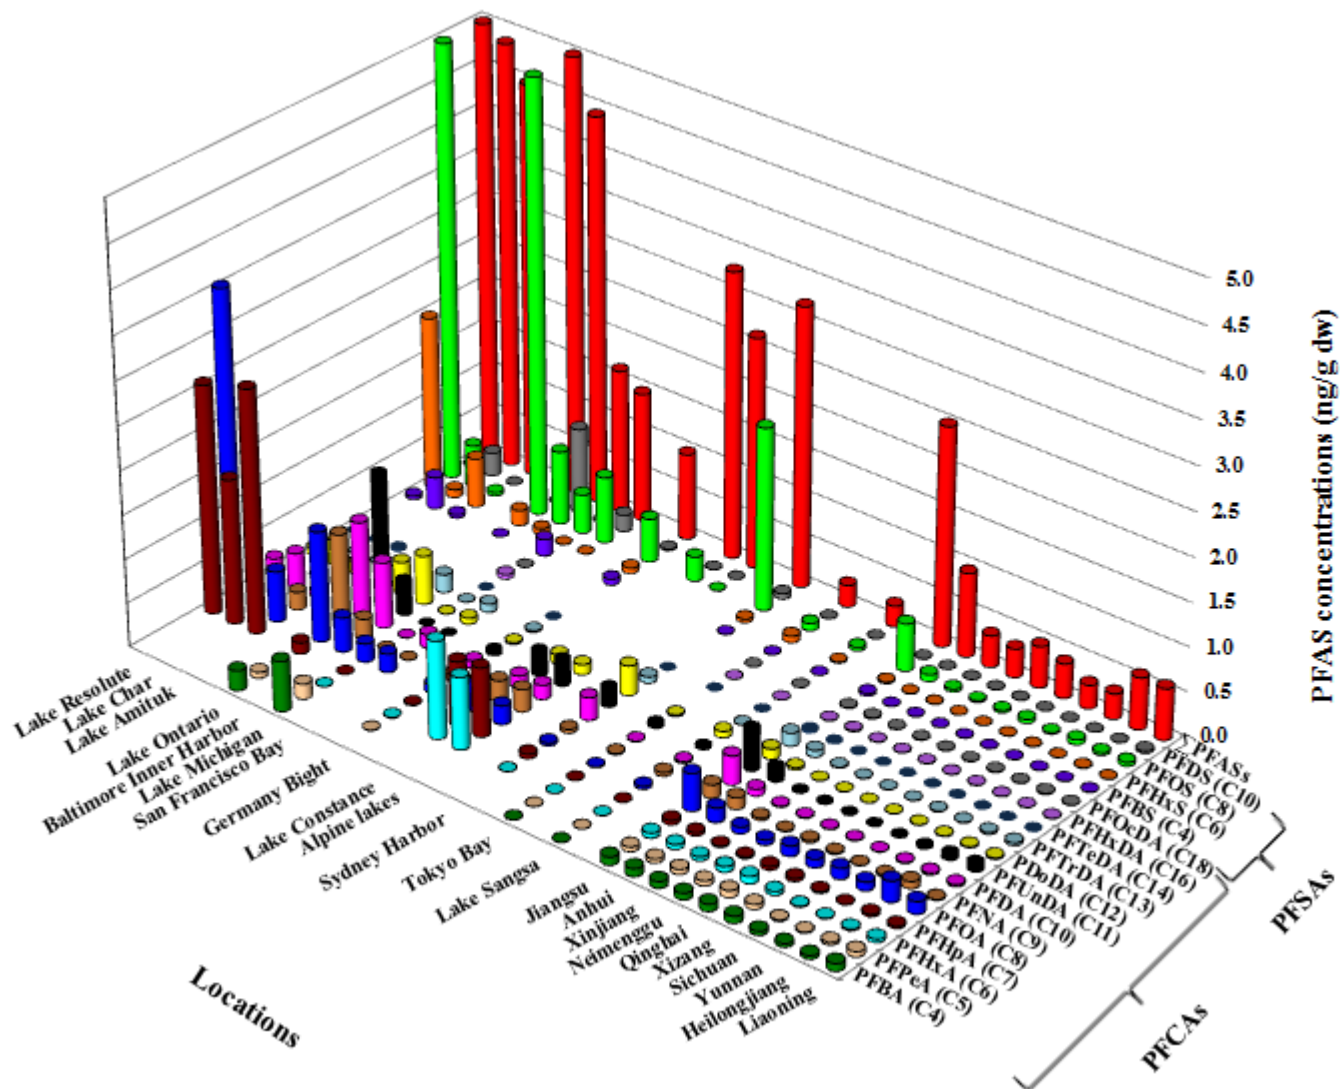

Figure S2 | Concentrations (ng/g dw) of PFASs in surface sediments from China, Japan, Austria, Germany, Australia, the USA and Canada (including sample size  $\geq 1$ ; No bar: no corresponding values)<sup>8-15</sup>. (We created the map using the Microsoft Office 2010 software for windows 2003/XP/VISTA/7.)

## Literature Cited

1. Wang, S. M. & Dou, H. S. *Chinese lakes 1st edn* (Beijing: Science Press, 1998). (in Chinese)
2. *Pagsum Lake*. (2012) Available at: [https://en.wikipedia.org/wiki/Lake\\_Cuogao](https://en.wikipedia.org/wiki/Lake_Cuogao). (Accessed: 24th December 2012)
3. Luo, Y., Xu, X. N. & Yan, W. Characteristics and evaluation of geological relic landscape in Yihai-Xiaoxiangling Mountains in Mianning country and Xide country. *Journal of Geological Hazards and Environment Preservation* **17**, 23-28 (2006). (in Chinese)
4. Yang, Y. T. & Liang, C. Research on runoff forecasting and optimal operation of Daqiao Reservoir in Xichang. *Sichuan Water Power* **27**, 77-80 (2008). (in Chinese)
5. *Yihai*. (2012) Available at: [http://baike.baidu.com/link?url=-rc7C3SZKwP6Q\\_1t6KgSkYdaVhkUJa23LboIxmb2PffN9YqQxMExXGhV5a4U8I1lvrqAokA4LDuO9sSk6SFRuoVgWm0EGXKf6Ll7HA7y7](http://baike.baidu.com/link?url=-rc7C3SZKwP6Q_1t6KgSkYdaVhkUJa23LboIxmb2PffN9YqQxMExXGhV5a4U8I1lvrqAokA4LDuO9sSk6SFRuoVgWm0EGXKf6Ll7HA7y7). (Accessed: 24th December 2012)
6. Jones, R. T. et al. Holocene environmental change at Lake Shudu, Yunnan Province, southwestern China. *Hydrobiologia* **693**, 223-235 (2012).
7. Pen, X. C., *Lake environment in China Vol. 3* (Beijing: Maritime Press, 1995). (in Chinese)
8. Ahrens, L. et al. Partitioning behavior of per- and polyfluoroalkyl compounds between pore water and sediment in two sediment cores from Tokyo Bay, Japan. *Environ. Sci. Technol.* **43**, 6969-6975 (2009).
9. Clara, M. et al. Perfluorinated alkylated substances in the aquatic environment: An Austrian case study. *Water Res.* **43**, 4760-4768 (2009).
10. Zhao, Z., Xie, Z. Y., Tang, J. H., Zhang, G. & Ebinghaus, R. Spatial distribution of perfluoroalkyl acids in surface sediments of the German Bight, North Sea. *Sci. Total Environ.* **511**, 145-152 (2015).
11. Thompson, J. et al. Perfluorinated alkyl acids in water, sediment and wildlife from Sydney Harbour and surroundings. *Mar. Pollut. Bull.* **62**, 2869-2875 (2011).
12. Yeung, L. W. Y. et al. Perfluoroalkyl substances and extractable organic fluorine in surface sediments and cores from Lake Ontario. *Environ. Int.* **59**, 389-397 (2013).
13. Higgins, C. P., Field, J. A., Criddle, C. S. & Luthy, R. G. Quantitative determination of perfluorochemicals in sediments and domestic sludge. *Environ. Sci. Technol.* **39**, 3946-3956 (2005).
14. Codling, G. et al. Historical trends of inorganic and organic fluorine in sediments of Lake Michigan. *Chemosphere* **114**, 203-209 (2014).
15. Stock, N. L., Furdui, V. I., Muir, D. C. G. & Mabury, S. A. Perfluoroalkyl contaminants in the Canadian Arctic: Evidence of atmospheric transport and local contamination. *Environ. Sci. Technol.* **41**, 3529-3536 (2007).
